# Supplementary material for: Tuning the effective utilization of adsorption sites in La-MOFs via a steric hindrance effect towards enhanced As(iii) removal
Source: Royal Society of Chemistry journal article supplement (doi:10.1039/d1en00608h), 2021-01-01
Supplement: d1en00608h1.pdf [file d1en00608h1.pdf]

## Supporting Information

### **Tuning the effective utilization of adsorption sites in La-MOFs via steric hindrance effect towards enhanced As(III) removal**

Deng You<sup>a, b, c</sup>, Hui Shi<sup>b, c</sup>, Liming Yang<sup>b, c</sup>, Penghui Shao<sup>b, c</sup>, Xubiao Luo<sup>b, c\*</sup>, Kai Yin<sup>a\*</sup>  
and Shenglian Luo<sup>a</sup>

<sup>a</sup> *State Key Laboratory of Chemo/Biosensing and Chemometrics, Hunan University, Changsha 410082, P. R. China*

<sup>b</sup> *Key Laboratory of Jiangxi Province for Persistent Pollutants Control and Resources Recycle, Nanchang Hangkong University, Nanchang 330063, P.R. China*

<sup>c</sup> *National-Local Joint Engineering Research Center of Heavy Metals Pollutants Control and Resource utilization, Nanchang Hangkong University, Nanchang 330063, P.R. China*

**\* Corresponding author**

**E-mail:** [luoxubiao@126.com](mailto:luoxubiao@126.com) (X. Luo)

**E-mail:** [yinkai@hnu.edu.cn](mailto:yinkai@hnu.edu.cn) (K. Yin)

## Contents

- SI 1:** Materials and methods
- SI 2:** Synthesis of the La-MOFs complex
- SI 3:** Material characterization
- SI 4:** Adsorption performance experiments
- SI 5:** Nitrogen adsorption-desorption isotherms, pore size distribution and particle size distribution analysis of three La-MOFs
- SI 6:** TEM images of (a) La-*p*-PTAs, La-*m*-PTAs and La-*o*-PTAs at 0.5 $\mu$ m
- SI 7:** EDS and XRD results of three absorbents before As(III) absorption
- SI 8:** The zeta potential, effect of pH on the adsorption capacities, adsorption isotherms and adsorption kinetics of three absorbents for As(III) absorption
- SI 9:** Adsorption isotherm Langmuir, Freundlich, Temkin, and D-R models for the adsorption of As(III) onto La-*p*-PTAs, La-*m*-PTAs and La-*o*-PTAs
- SI 10:** Kinetic isotherm pseudo-first order, pseudo-second order and intra-particle diffusion kinetic models for As(III) adsorption onto La-*p*-PTAs, La-*m*-PTAs and La-*o*-PTAs
- SI 11:** Adsorption isotherm of As(III) onto La-*o*-PTAs at different temperature
- SI 12:** Effect of competing ions for As(III) adsorption by La-*p*-PTAs, La-*m*-PTAs and La-*o*-PTAs
- SI 13:** Scanning electron microscopy (SEM) images and EDS results of three absorbents after As(III) absorption
- SI 14:** Elemental mapping images of three absorbents after As(III) absorption
- SI 15:** XPS results of three absorbents before and after As(III) absorption
- SI 16:** Theoretical calculations of three absorbents after As(III) absorption
- SI 17:** Density of states and corresponding projected density of states for adsorbed As(III) on three absorbents
- SI 18:** Illustrations of a mechanism of La-*p*-PTAs and La-*m*-PTAs for enhanced As(III) absorption
- SI 19:** Rietveld refinement results of three absorbents from XRD pattern

**SI 20:** Estimates of Langmuir and Freundlich parameter values for the adsorption of As(III) on three absorbents at 298K

**SI 21:** Estimates of parameter values for the adsorption of As(III) on three absorbents at 298K according to the pseudo-first-order and pseudo-second-order models

## SI 1: Materials and methods

*p*-phthalic acid (*p*-PTA: 99.0%), *m*-phthalic acid (*m*-PTA: 99.0%), *o*-phthalic acid (*o*-PTA: 99.0%), sodium arsenite (90.0%) and monopotassium phosphate (99.5%) were purchased from Sigma-Aldrich. Lanthanum chloride heptahydrate (99.9%) were purchased from J&K Chemical. Sodium hydroxide (99.5%), hydrochloric acid (36-38%), absolute ethyl alcohol (99.7%) and N, N'-dimethylformamide (99.5%) were purchased from West long chemical. A Milli-Q ultrapure water purification system (Millipore, Billerica, MA, resistivity >18.2 MΩ·cm) was used to produce deionized water (DI water). All chemicals were of analytical grade and used as-received. Aqueous solutions were all prepared by DI water.

## SI 2: Synthesis of the La-MOFs complex

The La-*p*-PTAs, La-*m*-PTAs and La-*o*-PTAs were fabricated via solvothermal methods. Specifically, La-*p*-PTAs complex was synthesized by adding 4 mmol LaCl<sub>3</sub>·7H<sub>2</sub>O and 2 mmol ligand *p*-PTA to a 100 mL flask, then 60 mL N, N'-dimethylformamide was added to the flask. Then, the mixture was sonicated for up to 30 min and the solution sealed and placed in an oven at 120 °C for 12 h. The precipitate was washed 3 times with ethanol and finally vacuum filtered until no residual solvent remained.

## SI 3: Material characterization

The morphology of the materials was observed using Tabs F200X transmission electron microscopy (TEM, FEI, USA) and SSX-550 scanning electron microscope (SEM, Shimadzu, Japan). Fourier transmission infrared spectra (FT-IR, 4000–400 cm<sup>-1</sup>) were recorded on a NICOLET NEXUS 4700 FT-IR spectrometer (Nicolet, Tacoma Washington, USA). X-ray photoelectron spectroscopy (XPS) was logged by a Kratos XSAM800 spectrometer utilizing Al target (1486.6 eV) X ray source (Kratos, UK). Surface structure parameters (BET Surface, pore volume, and pore diameter) were calculated by using the BJH method (BET, Quantachrome EVO, USA). The distribution of adsorption site was observed by QUANTACHROME Chembet Pulsar Temperature-programmed oxygen reduction (TPD-O<sub>2</sub>, Quantachrome, USA) and A-300 Electron Paramagnetic Resonance (EPR, BRUCKNER, Germany). The As(III)

concentrations was measured using inductively coupled plasma mass spectrometry (ICP-MS, ELAN DRC-e, Perkin Elmer, Waltham, MA).

#### **SI 4: Adsorption performance experiments**

As(III) solution (20 mL) with initial concentrations ranging from 100 to 600 mg L<sup>-1</sup> was prepared by dilution of concentrated stock solution with DI water. Adsorption isotherms of As(III) at 25 °C were determined by batch experiments, with an adsorbent dosage of 1.0 g L<sup>-1</sup> for all experiments. The adsorbed amount ( $Q_e$ ) for As(III) was calculated using the following:

$$Q_e = \frac{V(C_e - C_0)}{m} \quad (1)$$

where  $V$  is the volume of the As(III) solution,  $m$  is the mass of the La-MOFs adsorbent, and  $C_0$  and  $C_e$  are the initial and equilibrium solution concentrations of As(III), respectively.

Langmuir, Freundlich, Temkin and D-R models were used for fitting the temperature dependent adsorption data.<sup>1, 2</sup> As(III) adsorption kinetics were examined with an initial As(III) concentration of 600 mg L<sup>-1</sup> and placed under constant stirring to reduce mass transfer resistance. To analyze the effect of solution pH on As(III) adsorption, isotherms were determined for pH values varying from 1.0 to 11.0. Desired pH was obtained via dropwise addition of 0.1 M HCl or 0.1 M NaOH to the solution. Batch adsorption experiments were run in triplicate under stirring at 180 rpm for 24 h. The impacts of competing cations on As(III) (0.01 mol/L) adsorption were evaluated in the presence of NaCl, NaNO<sub>3</sub> and NaH<sub>2</sub>PO<sub>4</sub> (0.002 mol/L) at certain concentrations. All samples were filtered through 0.45 µm cellulose acetate membranes to separate the La-MOFs complex for analysis of As(III) in solution.

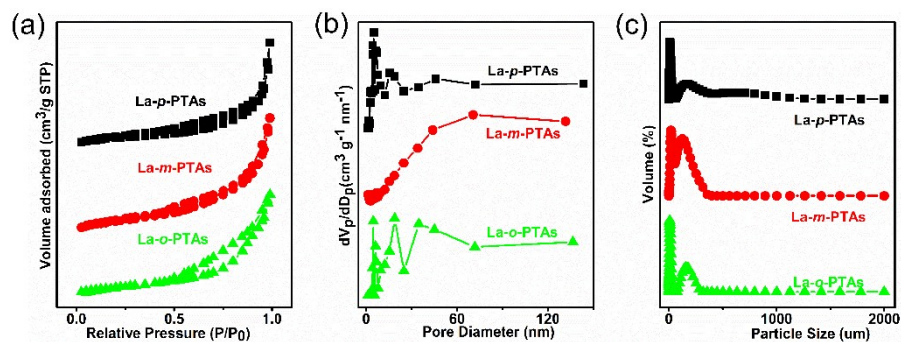

**Fig. S1** (a) Nitrogen adsorption-desorption isotherms, (b) pore size distribution and (c) particle size distribution analysis of three La-MOFs.

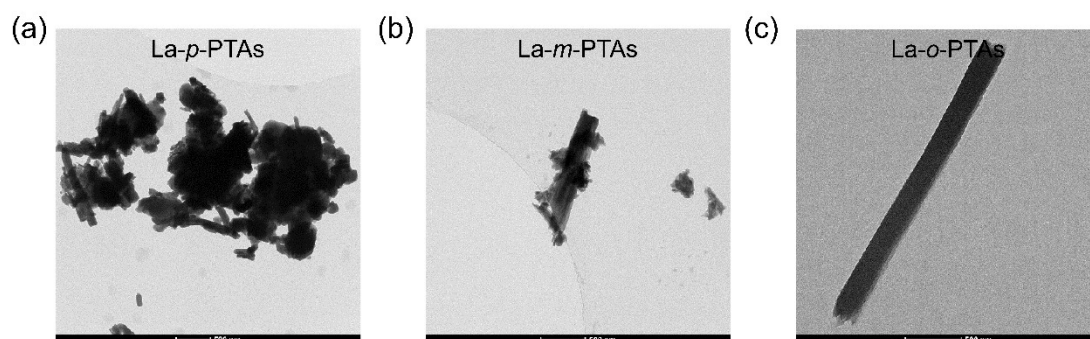

**Fig. S2** TEM images of (a) La-p-PTAs, La-m-PTAs and La-o-PTAs at 0.5μm.

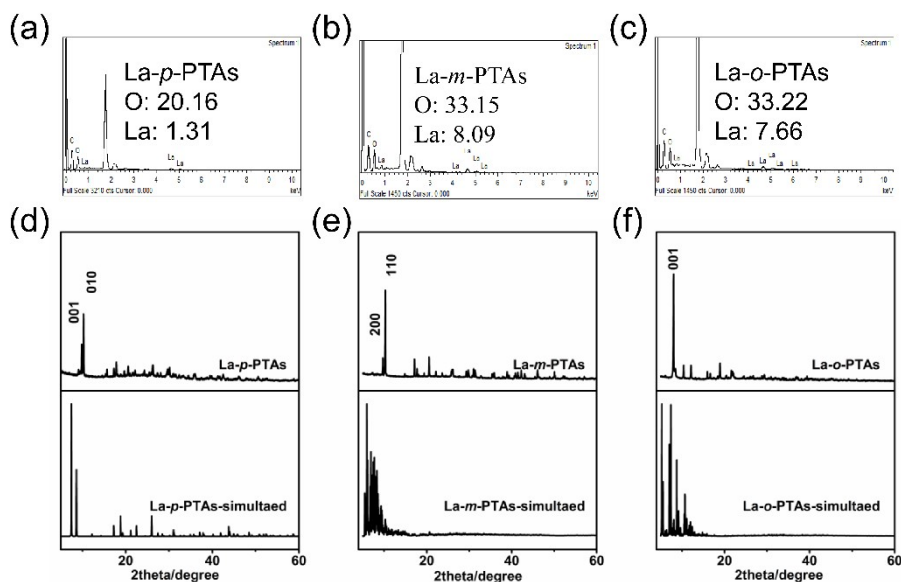

**Fig. S3** EDS results of (a) La-p-PTAs, (b) La-m-PTAs and (c) La-o-PTAs. X-ray diffraction (XRD) and corresponding simulated XRD for La-MOFs from rietveld refinement results for (d) La-p-PTAs, (e) La-m-PTAs and (f) La-o-PTAs.

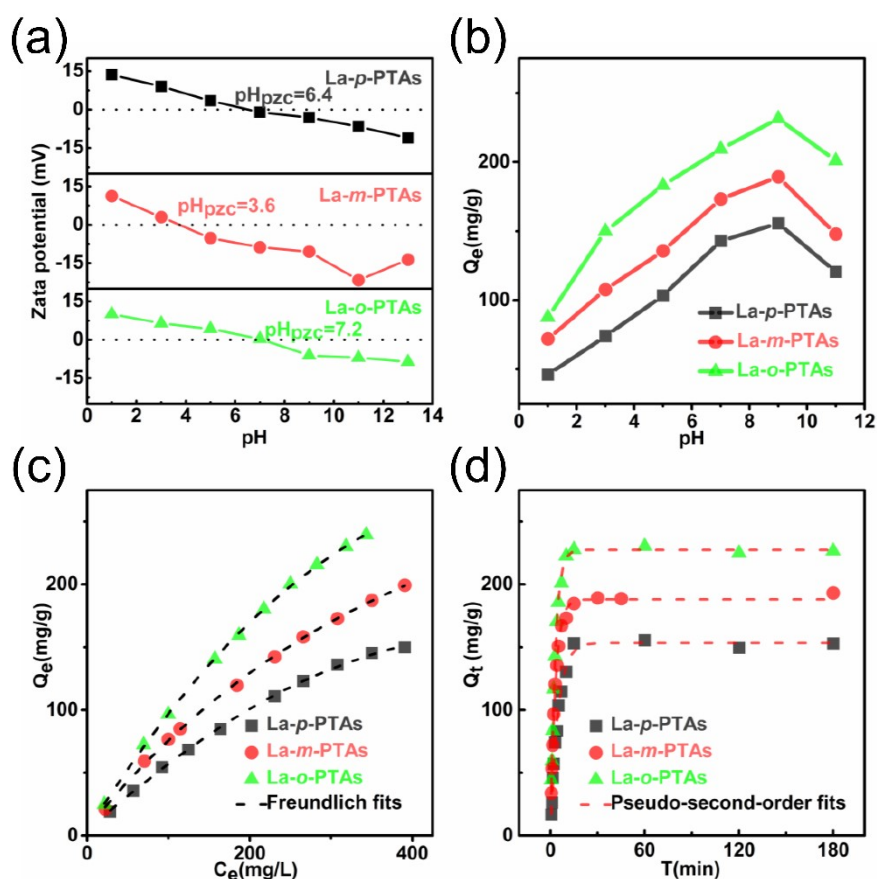

**Fig. S4** (a) The zeta potential of three absorbents. (b) Effect of pH on the adsorption capacities of As(III) on different ligand absorbents. The initial As(III) concentrations were 600 mg/L, the adsorbent dose was 1.0 g/L, the solution volume was 30 mL, the pH was 3.0–11.0, and the temperature was 298 K. (c) Adsorption isotherms at 298 K for As(III) onto La-*p*-PTAs, La-*m*-PTAs and La-*o*-PTAs. The adsorbent dose was 1.0 g/L, the solution volume was 30 mL, and the pH was 9. (d) Adsorption kinetics of As(III) absorption onto La-*p*-PTAs, La-*m*-PTAs and La-*o*-PTAs simulated using pseudo-second-order models. The initial concentrations of As(III) was 1 g/L, the adsorbent dose was 1.0 g/L, the solution volume was 400 mL, the pH was 9.0, and the temperature was 298 K.

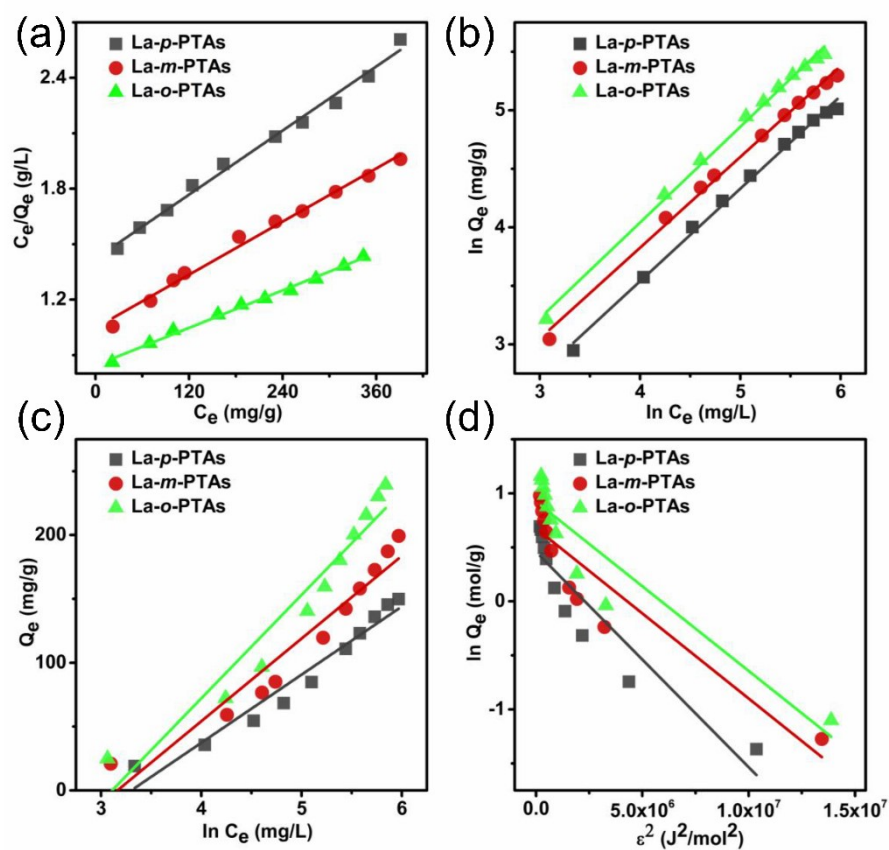

**Fig. S5** Adsorption isotherm (a) Langmuir, (b) Freundlich, (c) Temkin, and (d) D-R models for the adsorption of As(III) onto La-*p*-PTAs, La-*m*-PTAs and La-*o*-PTAs.

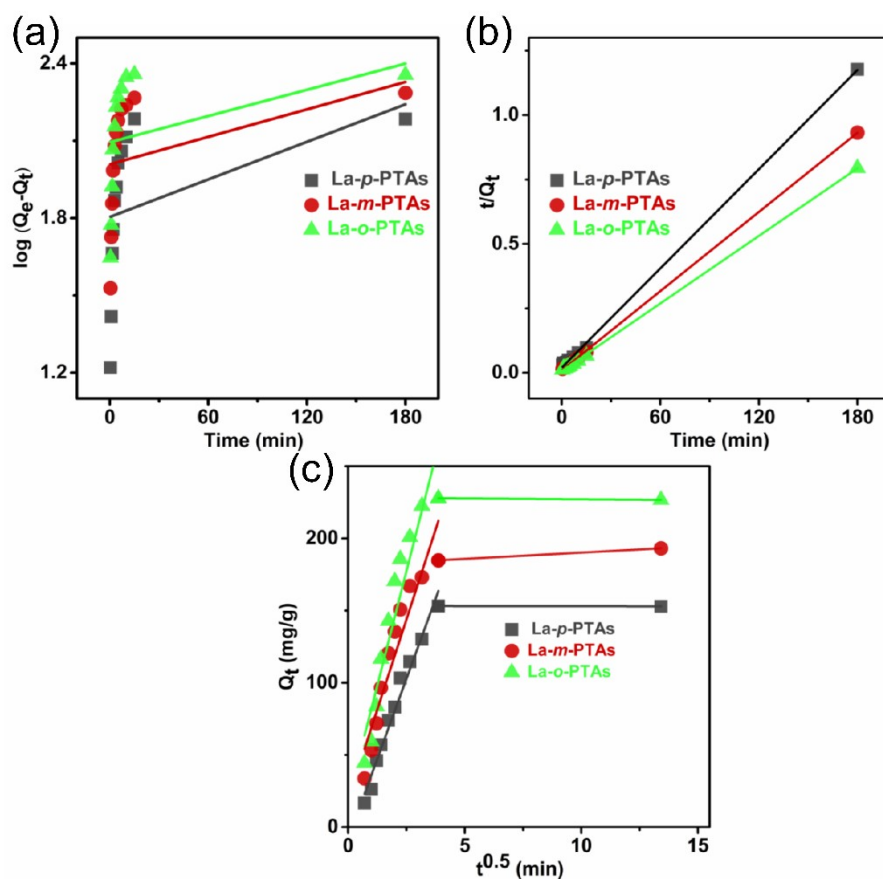

**Fig. S6** Kinetic isotherm (a) pseudo-first order, (b) pseudo-second order and (c) intra-particle diffusion kinetic models for As(III) adsorption onto La-*p*-PTAs, La-*m*-PTAs and La-*o*-PTAs.

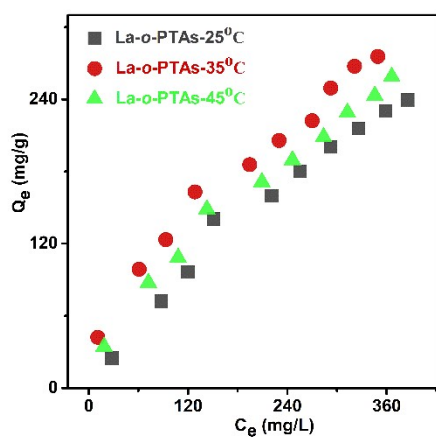

**Fig. S7** Adsorption isotherm of As(III) onto La-*o*-PTAs at different temperature.

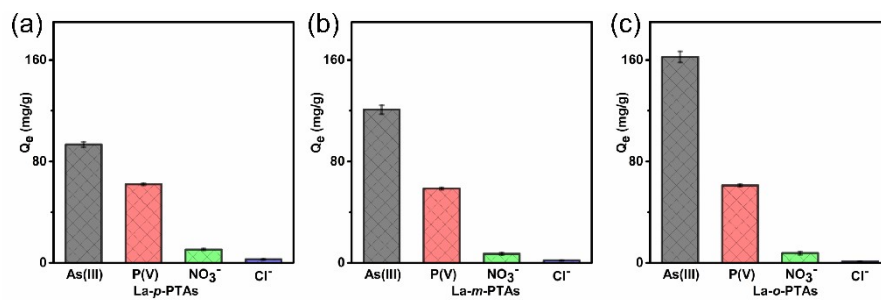

**Fig. S8** Effect of competing ions for As(III) adsorption by (a) La-*p*-PTAs, (b) La-*m*-PTAs and (c) La-*o*-PTAs.

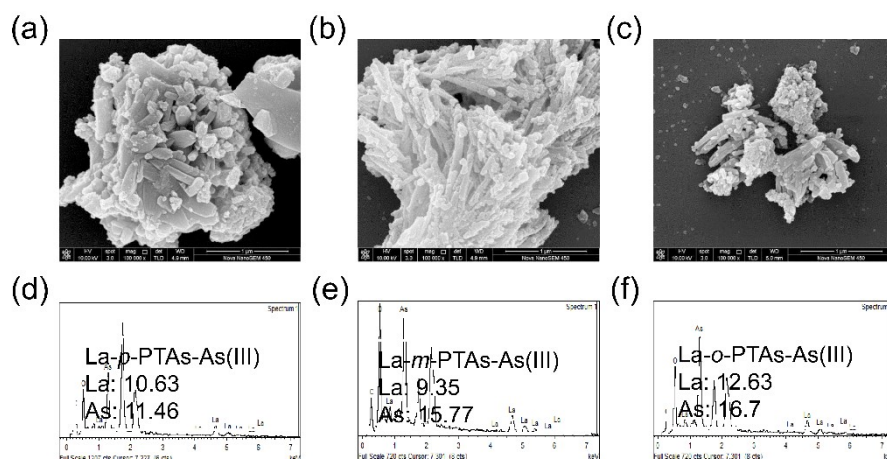

**Fig. S9** Scanning electron microscopy (SEM) images of (a) La-*p*-PTAs-As(III), (b) La-*m*-PTAs-As(III), and (c) La-*o*-PTAs-As(III). EDS results of (d) La-*p*-PTAs-As(III), (e) La-*m*-PTAs-As(III), and (f) La-*o*-PTAs-As(III).

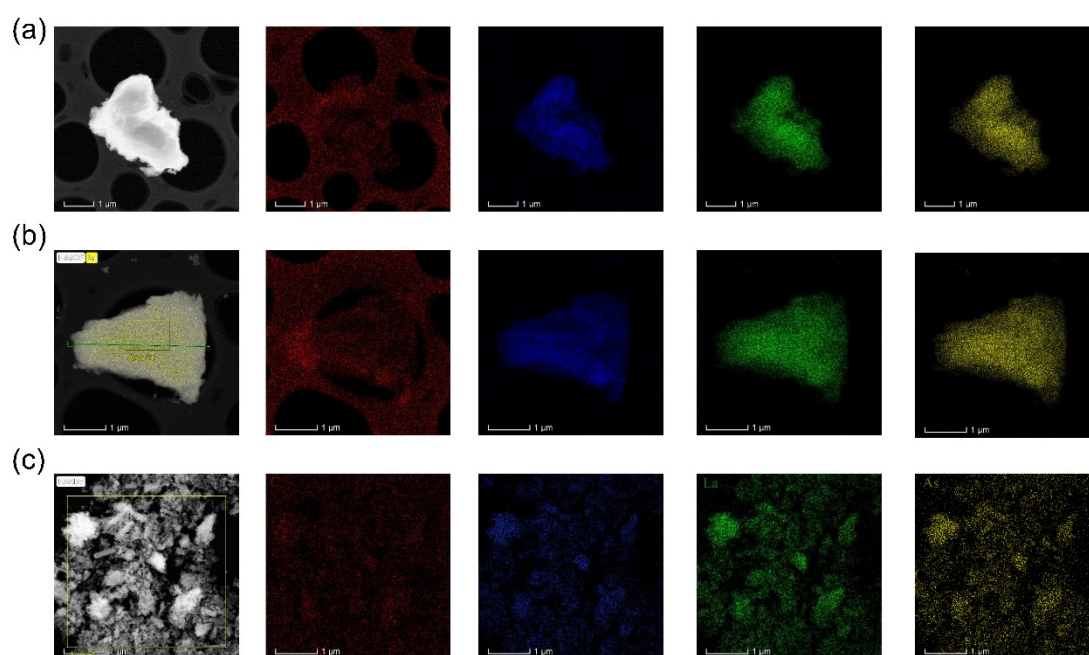

**Fig. S10** Elemental mapping images of (a) La-*p*-PTAs-As(III), (b) La-*m*-PTAs-As(III), and (c) La-*o*-PTAs-As(III).

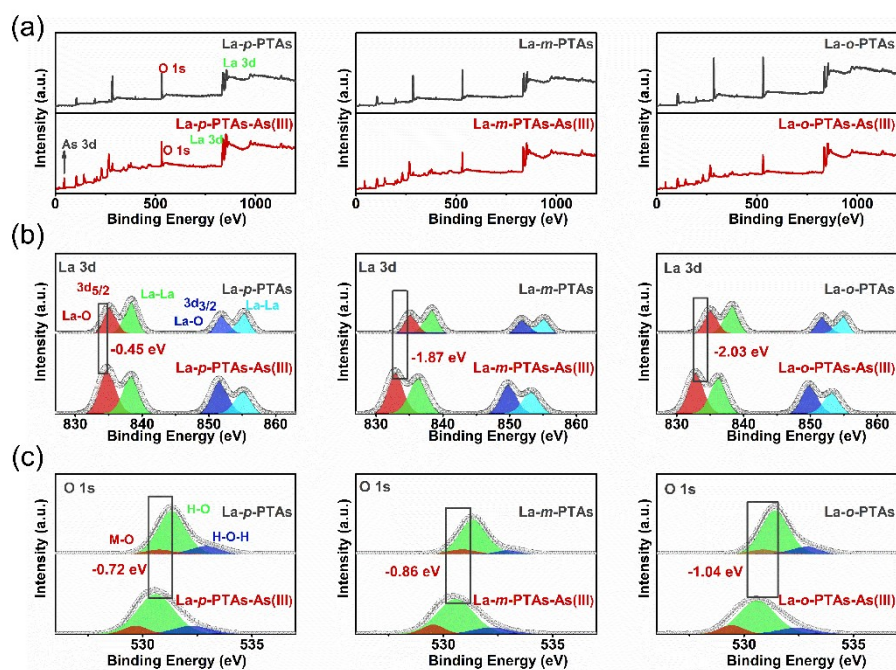

**Fig. S11** (a) XPS full spectra, (b) La 3d spectra, and (c) O 1s spectra for La-*p*-PTAs, La-*m*-PTAs and La-*o*-PTAs before and after As(III) absorption.

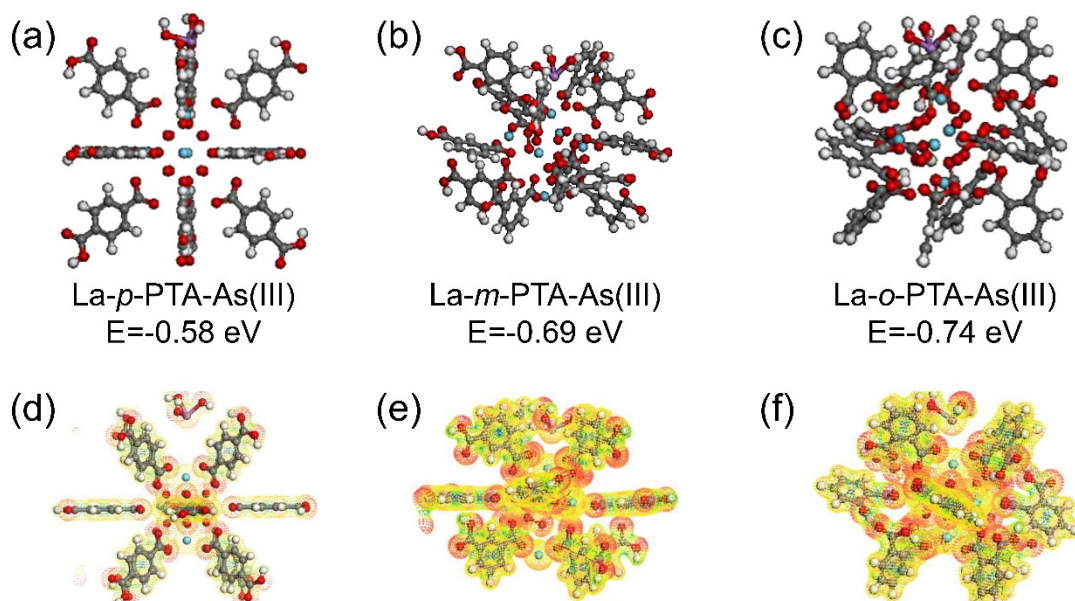

**Fig. S12** Theoretical calculations of (a) La-*p*-PTA-As(III), (b) La-*m*-PTA-As(III), and (c) La-*o*-PTA-As(III). Differential electron density distributions of (d) La-*p*-PTA-As(III), (e) La-*m*-PTA-As(III), and (f) La-*o*-PTA-As(III) ranging from 0 to 0.07705 eV. La light blue; O red; C brown; H white and As violet.

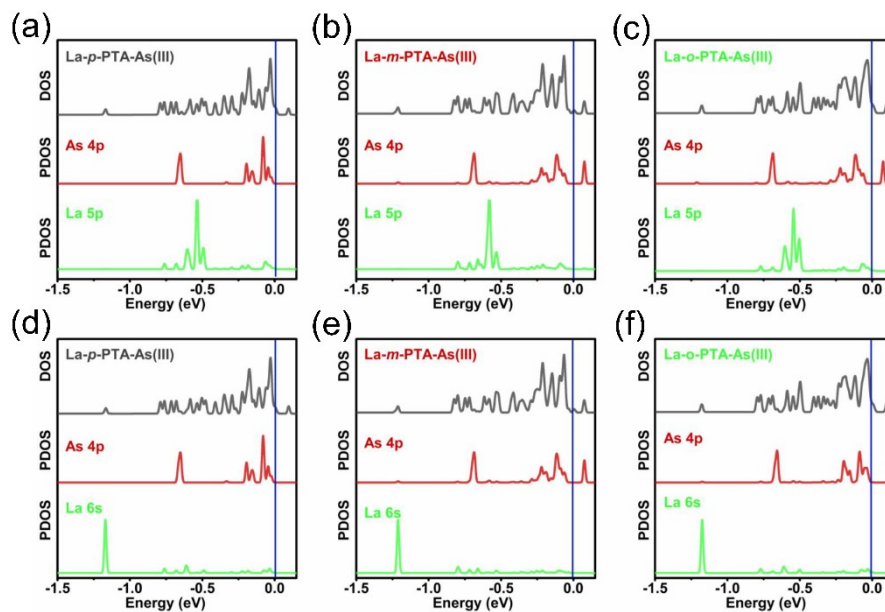

**Fig. S13** Density of states and corresponding projected density of states (O 2p, As 4p and La 5p for (a) La-*p*-PTA-As(III), (b) La-*m*-PTA-As(III), and (c) La-*o*-PTA-As(III). Density of states and corresponding projected density of states (O 2p, As 4p and La 6s for (d) La-*p*-PTA-As(III), (e) La-*m*-PTA-As(III), and (f) La-*o*-PTA-As(III).

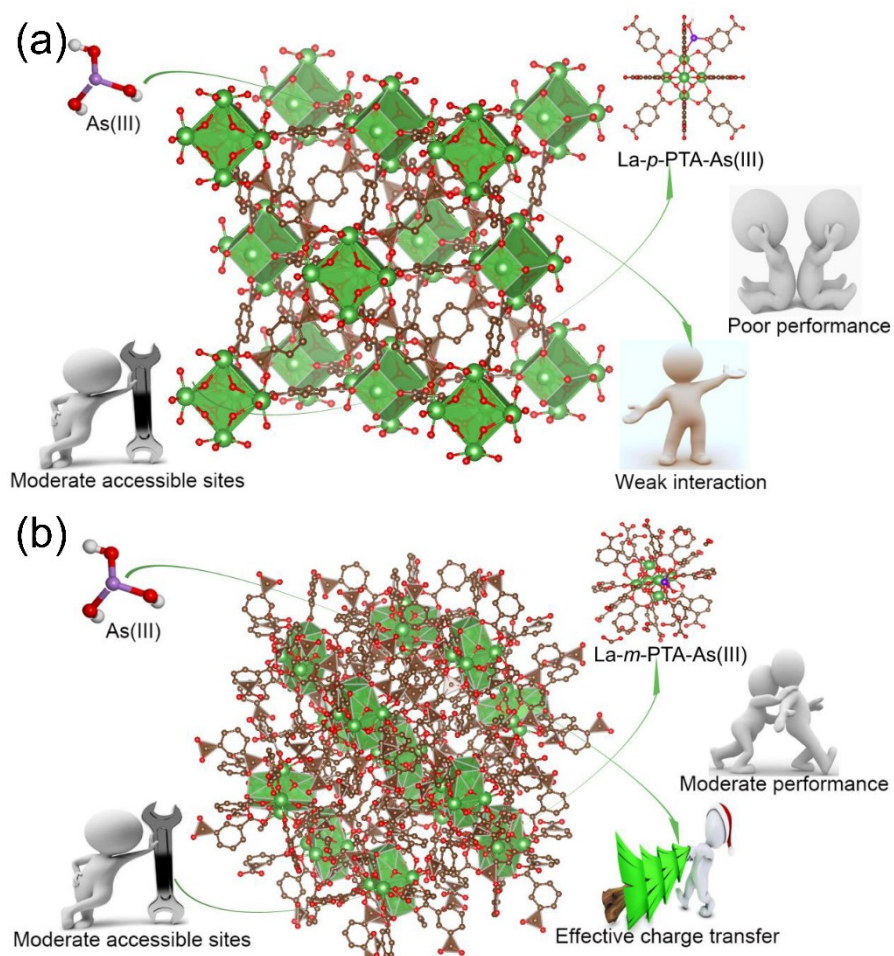

**Fig. S14** Mechanism illustrations of (a) La-*p*-PTAs and (b) La-*m*-PTAs for enhanced As(III) absorption.

**Table S1.** Rietveld refinement results of the La-*p*-PTAs, La-*m*-PTAs, and La-*o*-PTAs from XRD pattern.

| Absorbents         | La-La distances (Å) | crystal nucleus |
|--------------------|---------------------|-----------------|
| La- <i>p</i> -PTAs | 4.39                | 10              |
| La- <i>m</i> -PTAs | 3.31                | 13              |
| La- <i>o</i> -PTAs | 3.05                | 64              |

**Table S2.** Estimates of Langmuir and Freundlich parameter values for the adsorption of As(III) on different absorbents at 298K.

| Absorbents         | Langmuir isotherm parameters |                 |        | Freundlich isotherm parameters |                                                  |        |
|--------------------|------------------------------|-----------------|--------|--------------------------------|--------------------------------------------------|--------|
|                    | $Q_m$                        | $K_L(*10^{-3})$ | $R^2$  | $n$                            | $K_F$                                            | $R^2$  |
|                    | (mg/g)                       | (L/mg)          |        |                                | ( $\text{mg}^{1-(1/n)}\text{L}^{1/n}/\text{g}$ ) |        |
| La- <i>p</i> -PTAs | 346.02                       | 2.03            | 0.9901 | 1.08                           | 2.17                                             | 0.9997 |
| La- <i>m</i> -PTAs | 198.41                       | 5.48            | 0.9934 | 1.29                           | 2.05                                             | 0.9951 |
| La- <i>o</i> -PTAs | 591.72                       | 2.00            | 0.9943 | 1.22                           | 2.15                                             | 0.9959 |

**Table S3.** Estimates of parameter values for the As(III)adsorption on different absorbents at 298K according to the pseudo-first-order and pseudo-second-order models.

| Adsorbate <sup>a</sup> | pseudo-first-order    |              |        | pseudo-second-order                     |              |                                           |       |
|------------------------|-----------------------|--------------|--------|-----------------------------------------|--------------|-------------------------------------------|-------|
|                        | $K_t$                 | $Q_e$ (mg/g) | $R^2$  | $K_2 \times 10^{-3}$                    | $Q_e$ (mg/g) | $h_0$                                     | $R^2$ |
|                        | ( $\text{min}^{-1}$ ) |              |        | $\text{g}/(\text{mg} \cdot \text{min})$ |              | ( $\text{mg}/\text{g} \cdot \text{min}$ ) |       |
| La- <i>p</i> -PTAs     | 0.00643               | 65.70        | 0.183  | 2.22                                    | 155.5        | 53.6                                      | 0.999 |
| La- <i>m</i> -PTAs     | 0.00453               | 108.4        | 0.0818 | 2.94                                    | 195.3        | 112.0                                     | 0.999 |
| La- <i>o</i> -PTAs     | 0.00448               | 126.9        | 0.131  | 3.05                                    | 228.8        | 159.5                                     | 0.999 |

## References

1. M. A. Ahsan, V. Jabbari, M. T. Islam, R. S. Turley, N. Dominguez, H. Kim, E. Castro, J. A. H.-Viezcas, M. L. Curry, J. Lopez, J. L. G.-Torresdey, J. C. Noveron, Sustainable synthesis and remarkable adsorption capacity of MOF/graphene oxide and MOF/CNT based hybrid nanocomposites for the removal of Bisphenol A from water, *Sci. Total Environ.*, 2019, 673, 306–317.
2. Md. A. Ahsan, V. Jabbari, M. A. Imam, E. Castro, H. Kim, M. L. Curry, D. J. V.-Rosales, J. C. Noveron, Nanoscale nickel metal organic framework decorated over graphene oxide and carbon nanotubes for water remediation, *Sci. Total Environ.*, 2020, 698, 134214.
